# Supplementary material for: Residential Segregation
Source: MDPI journal article supplement (doi:10.3390/encyclopedia3040100), 2023-10-31
Supplement: s1 [file s1]

# Re: Re: AW: Zweitveröffentlichung

bott@transcript-verlag.de

Di 18.07.2023 11:30

An: Bernt, Matthias <Matthias.Bernt@leibniz-irs.de>;

Lieber Herr Bernt,

und jetzt sogar schon die Antwort; so zügig kann's gehen.  
Die Zweitveröffentlichung des übersetzten Kapitels können wir Ihnen gerne kostenfrei genehmigen.

Herzliche Grüße,

Luisa Bott

bott@transcript-verlag.de; schrieb:

> To: "Bernt, Matthias" <Matthias.Bernt@leibniz-irs.de>;

> From: bott@transcript-verlag.de

> Subject: Re: AW: Zweitveröffentlichung

> X-Attachments:

>

> Lieber Herr Bernt,

>

> bis dato leider noch nicht. Ich werde noch einmal nachhaken und meine  
> Kolleginnen darauf hinweisen, dass wir die Rückmeldung bis spätestens Ende  
> der Woche brauchen.

>

> Herzliche Grüße,

>

> Luisa Bott

>

> "Bernt, Matthias" <Matthias.Bernt@leibniz-irs.de>; schrieb:

>> From: "Bernt, Matthias" <Matthias.Bernt@leibniz-irs.de>

>> To: "bott@transcript-verlag.de" <bott@transcript-verlag.de>

>> Subject: AW: Zweitveröffentlichung

>> Date: Tue, 18 Jul 2023 07:33:11 +0000

>>

>> Liebe Frau Bott,

>>

>> haben Sie schon Neuigkeiten von Ihrer Rights-Abteilung? Entschuldigen Sie  
>> bitte, dass ich drängele. Ich fahre nur am Freitag in den Urlaub und wollte  
>> vorher alles klären. Ist das zu schaffen?

>>

>> Mit besten Grüßen,

>>

>> Matthias Bernt

>>

>> \_\_\_\_\_

>> Von: bott@transcript-verlag.de <bott@transcript-verlag.de>

>> Gesendet: Donnerstag, 13. Juli 2023 14:50

>>An: Bernt, Matthias  
>>Betreff: Re: Zweitveröffentlichung  
>>  
>>Lieber Herr Bernt,  
>>  
>>vielen dank zuerst einmal für die Freigabe! Ich werde die Infos zum Umschlag  
>>dann einarbeiten und alles an unsere Druckaufbereitung geben.  
>>Bezüglich der Anfrage zur Zweitveröffentlichungen muss ich mich allerdings  
>>noch einmal mit unserer Rights-Abteilung kurzschließen und melde mich dann  
>>wieder bei Ihnen.  
>>  
>>Herzliche Grüße,  
>>  
>>Luisa Bott  
>>  
>>"Bernt, Matthias" <Matthias.Bernt@leibniz-irs.de>; schrieb:  
>>>From: "Bernt, Matthias" <Matthias.Bernt@leibniz-irs.de>  
>>>To: "bott@transcript-verlag.de" <bott@transcript-verlag.de>  
>>>Subject: Zweitveröffentlichung  
>>>Date: Thu, 13 Jul 2023 08:30:12 +0000  
>>>  
>>>Liebe Frau Bott,  
>>>  
>>>ich wurde von dem englischsprachigen MDPI-Journal "Encyclopedia" für einen  
>>>Überblicksartikel zum Thema "Segregation" angefragt. Da ich unserem Buch  
>>>eigentlich schon alles geschrieben habe, was ich zum Thema sagen kann,  
>>würde  
>>>ich dem Journal eigentlich gerne eine Übersetzung des entsprechenden  
>>>Kapitels anbieten wollen. Kann ich dafür Ihre Genehmigung kriegen? Wichtig  
>>>wäre eine kostenlose Bereitstellung.  
>>>  
>>>Mit besten Grüßen,  
>>>  
>>>Matthias Bernt  
>>>  
>>  
>>-----  
>>| Luisa Bott (sie/ihr)  
>>| Projektmanagement|Programmabteilung|Lektorat  
>>| E-Mail: bott@transcript-verlag.de  
>>| Tel. +49 (521) 39 37 97-57  
>>| Bürozeiten: Montag bis Freitag 9-12 Uhr (nach Vereinbarung)  
>>-----  
>>transcript Verlag - Hermannstraße 26 - D-33602 Bielefeld  
>>-----  
>>Besuchen Sie unsere Homepage:  
>>[http://www.transcript-verlag.de<http://www.transcript-verlag.de]www.transcript-verlag.de<http://www.transcript-verlag.de>  
>>-----  
>>transcript Verlag - Roswitha Gost - Karin Werner  
>>-----  
>>  
>>Neue Marke: transcript.learning: Gerne möchten wir Sie als Autor\*in von  
>>Studienbüchern und innovativen Lehrmedien gewinnen! Sprechen Sie uns einfach  
>>an: <https://transcript-learning.de>  
>>  
>>Stichwort Datenschutz - die aktuelle Datenschutzrichtlinie findet sich unter

> > <https://www.transcript-verlag.de/datenschutzerklaerung>  
> >

-----  
| Luisa Bott (sie/ihr)  
| Projektmanagement|Programmabteilung|Lektorat  
| E-Mail: bott@transcript-verlag.de  
| Tel. +49 (521) 39 37 97-57  
| Bürozeiten: Montag bis Freitag 9-12 Uhr (nach Vereinbarung)  
-----

transcript Verlag - Hermannstraße 26 - D-33602 Bielefeld  
-----

Besuchen Sie unsere Homepage: [www.transcript-verlag.de](http://www.transcript-verlag.de)  
-----

transcript Verlag - Roswitha Gost - Karin Werner  
-----

»Auf dem Weg zu einer Neuen Aufklärung« - in der Reihe: »THE NEW INSTITUTE.Interventions«. <https://www.transcript-open.de/isbn/6635>

Stichwort Datenschutz - die aktuelle Datenschutzrichtlinie findet sich unter <https://www.transcript-verlag.de/datenschutzerklaerung>
